# Supplementary material for: The Gender Pain Gap: gender inequalities in pain across 19 European countries
Source: PubMed Central journal article supplement (PMC8873965; doi:10.1177/1403494820987466), 2021-02-10
Supplement: sj-pdf-1-sjp-10.1177_1403494820987466.pdf [file sj-pdf-1-sjp-10.1177_1403494820987466.pdf]

**Supplementary Table 1: A sensitivity analysis showing prevalence of pain by gender at the pan-European level.**

Blue shows pain prevalence for participants in the 25-74 years age range; while red shows pain prevalence for participants in the 15+ years age range.

| Pain Variable          |            | Back/Neck (%) | Hand/Arm (%) | Foot/leg (%) | Any pain (%) |
|------------------------|------------|---------------|--------------|--------------|--------------|
| <b>Europe (pooled)</b> | Men        | 40.8          | 22.8         | 24.3         | 55.5         |
|                        |            | 38.3          | 21.8         | 24.5         | 54.6         |
|                        | Difference | 2.5           | 1.0          | -0.2         | 0.9          |
|                        | Women      | 47.3          | 27.4         | 26.6         | 62.3         |
|                        |            | 46.2          | 27           | 27.8         | 62.2         |
|                        | Difference | 1.1           | 0.4          | -1.2         | 0.1          |
