# Supplementary material for: The Gender Pain Gap: gender inequalities in pain across 19 European countries
Source: PubMed Central journal article supplement (PMC8873965; doi:10.1177/1403494820987466), 2021-02-10
Supplement: sj-pdf-2-sjp-10.1177_1403494820987466.pdf [file sj-pdf-2-sjp-10.1177_1403494820987466.pdf]

## Supplementary Table 2: an overview of missing data

Cases deleted for missing data of: country, pain variables, gender, age

|                                    |                    |        |
|------------------------------------|--------------------|--------|
|                                    | Initial sample     | 40185  |
| Restriction                        | Drop Israel        | 2562   |
|                                    | Drop Estonia       | 2051   |
|                                    | Drop Age <25       | 4111   |
|                                    | Drop Age >=74      | 3,387  |
| Total restriction                  | Selected variables | 12,111 |
| Missing                            | pain variables     | 296    |
|                                    | gender             | 15     |
|                                    | Age                | 72     |
| Total missing cases                |                    | 383    |
| Total case including missing cases |                    | 27,935 |
| % missing cases                    |                    | 1.4%   |
|                                    | Final sample       | 27552  |
